# Supplementary material for: Spatial distribution and geochemical baselines of major/trace elements in soils of Medak district, Andhra Pradesh, India
Source: Springer Nature journal article supplement (doi:10.1007/s12665-013-3014-7), 2014-02-03
Supplement: MOESM3 [file 11838834]

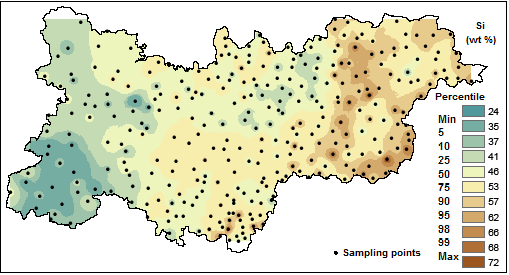

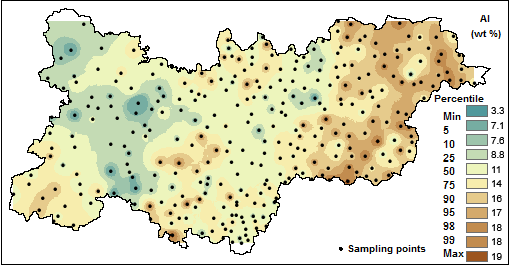

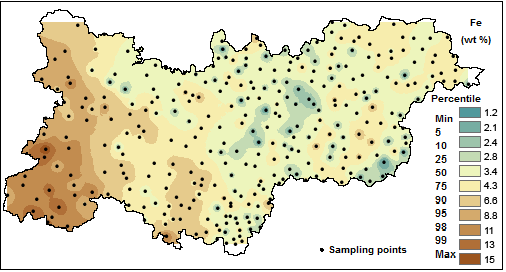


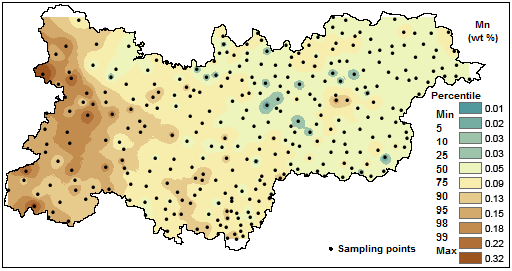

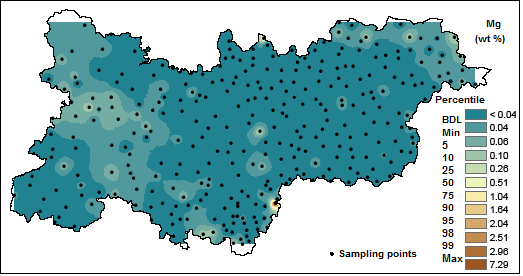

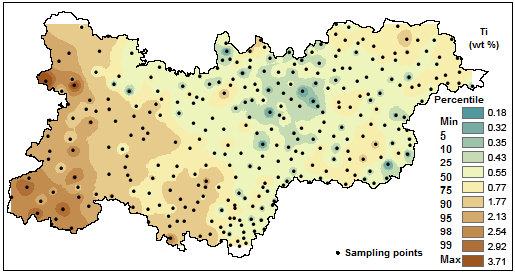


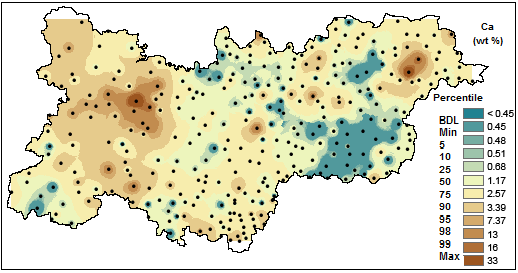

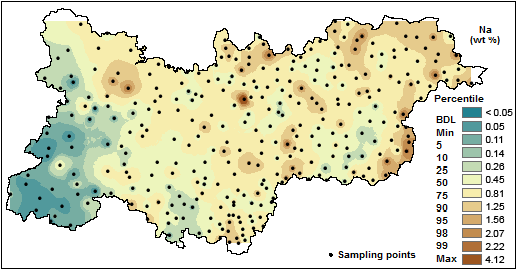

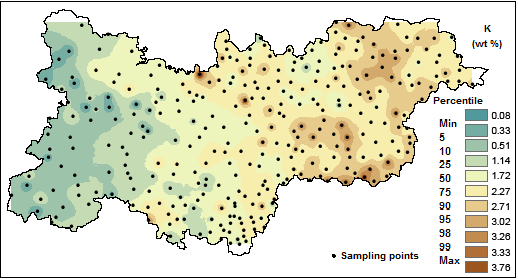


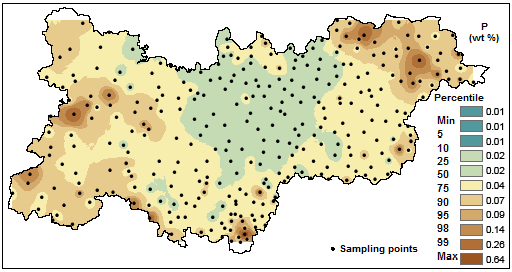

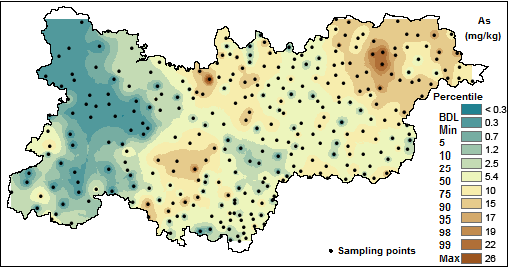

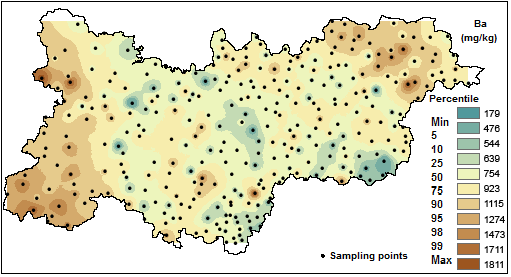


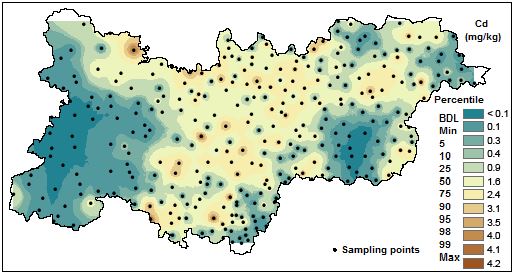

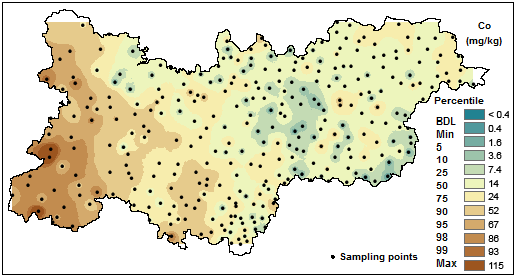

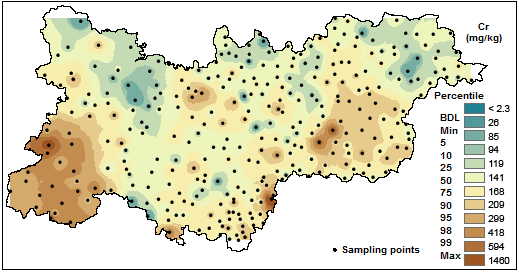


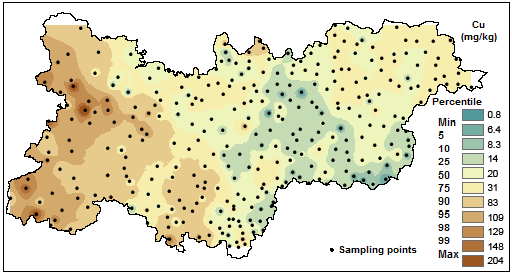

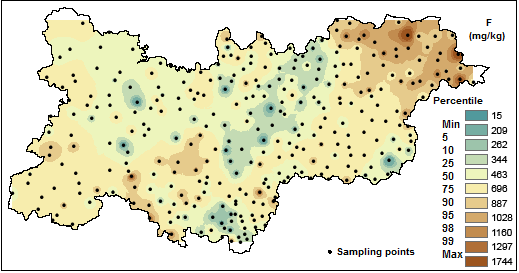

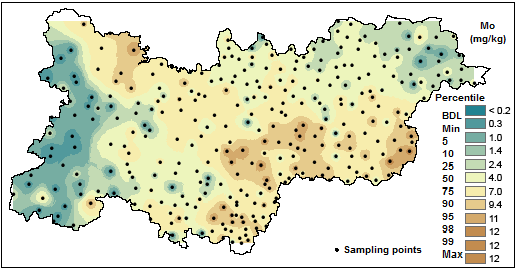


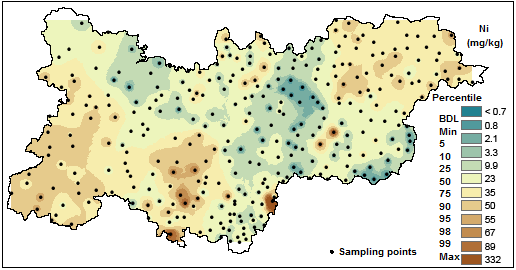

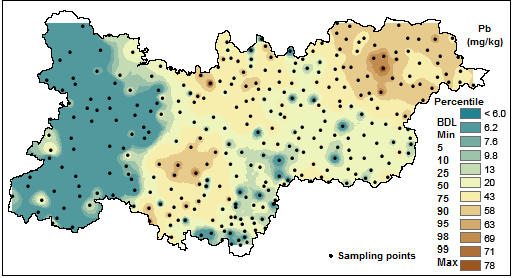

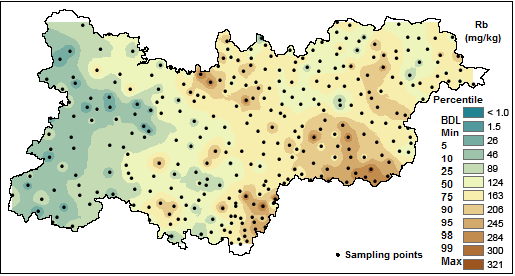


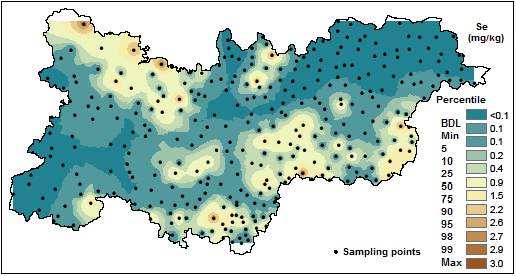

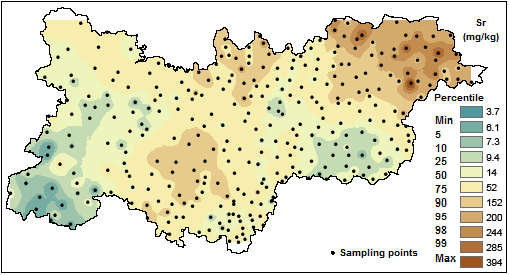

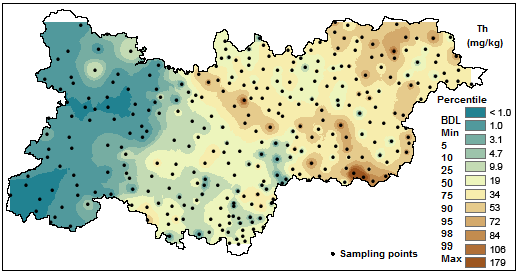


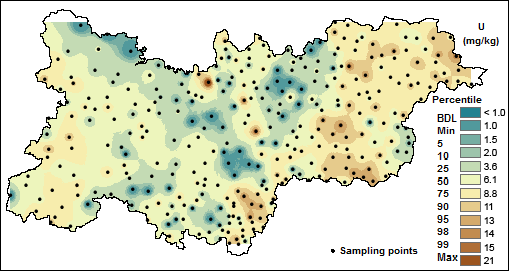

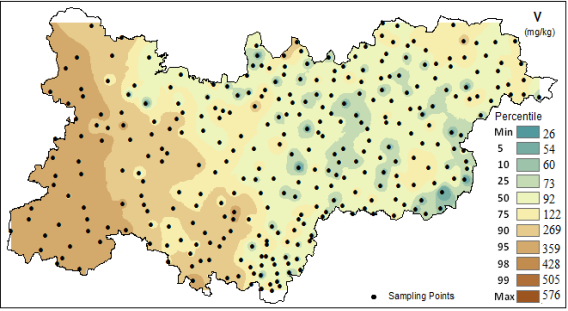

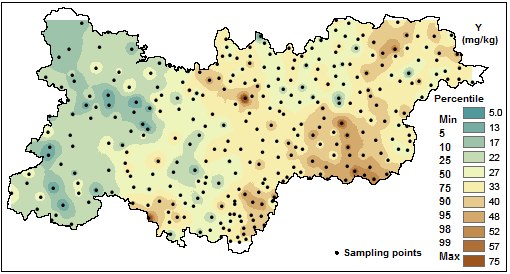


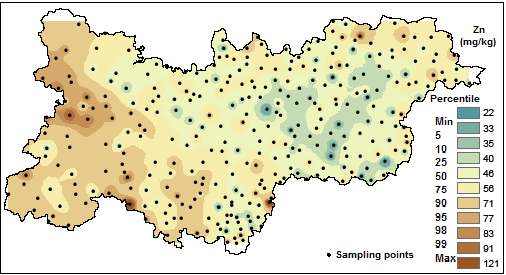

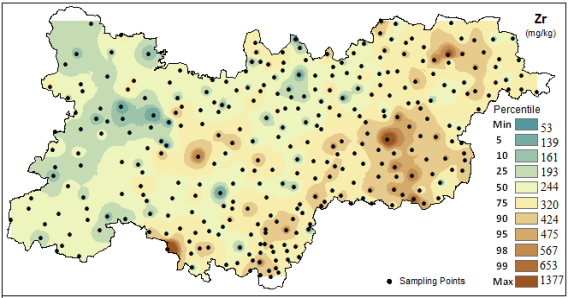


Figure showing spatial distribution of elements in subsoil in Medak district, Andhra Pradesh, India using Inverse Distance Weighted Method for whole database. The colour scale is based on the following percentiles: BDL, Min, 5th, 10th, 25th, 50th, 75th, 90th, 95th, 98th, 99th and Max.
