# Supplementary material for: Spatial distribution and geochemical baselines of major/trace elements in soils of Medak district, Andhra Pradesh, India
Source: Springer Nature journal article supplement (doi:10.1007/s12665-013-3014-7), 2014-02-03
Supplement: MOESM7 [file 11838834]

## Sheet: Sheet1
					Figure showing box-and-whisker plot for elements based on textural class in topsoil from Medak district, Andhra Pradesh, India. Mean is shown by filled square symbol and median is the line across the box. Si, Al, Fe, Mn, Mg, Ca, Na, K, Ti, P expressed in (wt %) and As, Ba, Cd, Co, Cr, Cu, F, Mo, Ni, Pb, Rb, Se, Sr, Th, U, V, Y, Zn, Zr expressed in (mg/kg-)
